# Supplementary material for: Gene Expression Analysis Suggests Immunological Changes of Peripheral Blood Monocytes in the Progression of Patients With Coronary Artery Disease
Source: Front Genet. 2021 Mar 11;12:641117. doi: 10.3389/fgene.2021.641117 (PMC7990797; doi:10.3389/fgene.2021.641117)
Supplement: Supplementary Table 2 — 169 differentially expressed genes between ICL and NCA. [file Table_2.XLSX]

## Sheet: supplementary table 2
Supplementary Table 2. 169 differentially expressed genesbetween ICL and NCA.
Gene Name	ICL vs NCA	Fold Change	|Log2FoldChange|	FDR	Log10FDR
	Up/Down
UCHL1	up	27.51	4.78	7.01×10-7	-6.15
TAF1C	up	2.38	1.25	1.18×10-3	-2.93
TICAM1	up	2.77	1.47	4.34×10-3	-2.36
SEMA6B	up	10.3	3.36	5.46×10-3	-2.26
CCL2	up	10.58	3.4	5.46×10-3	-2.26
LEKR1	up	14.06	3.81	5.46×10-3	-2.26
IL23A	up	24.61	4.62	5.46×10-3	-2.26
RARG	up	2.83	1.5	5.50×10-3	-2.26
MIR4425	up	5.47	2.45	7.47×10-3	-2.13
PHLDA2	up	6.73	2.75	7.47×10-3	-2.13
CSF3	up	530.34	9.05	7.47×10-3	-2.13
ICAM1	up	6.36	2.67	9.62×10-3	-2.02
ACOD1	up	31.91	5	1.07×10-2	-1.97
ZC3H12A	up	6.56	2.71	1.08×10-2	-1.97
PTGES	up	10.45	3.39	1.20×10-2	-1.92
SLC2A6	up	3.63	1.86	1.23×10-2	-1.91
IDO2	up	14.67	3.87	1.26×10-2	-1.9
CCL20	up	38.27	5.26	1.35×10-2	-1.87
HMGA1	up	3.51	1.81	1.36×10-2	-1.87
RGS1	up	6.75	2.75	1.36×10-2	-1.87
IL1A	up	28.87	4.85	1.36×10-2	-1.87
BEX1	up	60.17	5.91	1.36×10-2	-1.87
SERPINB2	up	28.67	4.84	1.41×10-2	-1.85
PA2G4P4	up	4.98	2.32	1.61×10-2	-1.79
TRAF4	up	5.9	2.56	1.61×10-2	-1.79
DDIT3	up	6.81	2.77	1.62×10-2	-1.79
SYNJ2	up	7.73	2.95	1.62×10-2	-1.79
MAFF	up	8.43	3.08	1.62×10-2	-1.79
FSHB	up	1140.43	10.16	1.62×10-2	-1.79
LY9	up	2.84	1.51	1.64×10-2	-1.79
OLR1	up	15.28	3.93	1.64×10-2	-1.79
CDKN1A	up	3.68	1.88	1.66×10-2	-1.78
GPR132	up	5.66	2.5	1.69×10-2	-1.77
CHGB	up	119.49	6.9	1.69×10-2	-1.77
IRAK2	up	13.83	3.79	1.74×10-2	-1.76
IL18	up	6.89	2.79	1.78×10-2	-1.75
NNAT	up	265.06	8.05	1.78×10-2	-1.75
AGAP3	up	2.74	1.46	1.79×10-2	-1.75
DHCR7	up	3.95	1.98	1.83×10-2	-1.74
LMNA	up	5.34	2.42	1.83×10-2	-1.74
CCRL2	up	8.2	3.04	1.83×10-2	-1.74
NIPAL4	up	25.7	4.68	1.83×10-2	-1.74
GPR84	up	7.49	2.91	1.90×10-2	-1.72
ZNF331	up	3.75	1.91	1.97×10-2	-1.71
TWISTNB	up	3.73	1.9	1.99×10-2	-1.7
PHLDB1	up	12.4	3.63	2.00×10-2	-1.7
RAB3B	up	15.4	3.94	2.03×10-2	-1.69
ENO2	up	12.36	3.63	2.09×10-2	-1.68
CCR7	up	13.07	3.71	2.09×10-2	-1.68
ECM1	up	5.42	2.44	2.09×10-2	-1.68
NR4A1	up	2.7	1.43	2.16×10-2	-1.67
SNAI1	up	5.12	2.36	2.16×10-2	-1.67
CDIP1	up	2	1	2.49×10-2	-1.6
ZNF385A	up	2.68	1.42	2.50×10-2	-1.6
LGMN	up	4.62	2.21	2.55×10-2	-1.59
TMEM104	up	2.48	1.31	2.61×10-2	-1.58
VSTM1	up	3.38	1.76	2.62×10-2	-1.58
PBX4	up	3.91	1.97	2.62×10-2	-1.58
GPX3	up	5.86	2.55	2.62×10-2	-1.58
MAMLD1	up	37.42	5.23	2.62×10-2	-1.58
CCDC24	up	2.14	1.1	2.65×10-2	-1.58
PRR29	up	2.97	1.57	2.69×10-2	-1.57
BATF3	up	5.92	2.56	2.72×10-2	-1.57
ZNF267	up	5.09	2.35	2.75×10-2	-1.57
SLC17A9	up	2.04	1.03	2.84×10-2	-1.55
TRIP10	up	9.05	3.18	2.85×10-2	-1.54
COL1A1	up	5.62	2.49	3.02×10-2	-1.52
RALGDS	up	5.96	2.58	3.02×10-2	-1.52
AL592429.1	up	4.41	2.14	3.14×10-2	-1.5
AL031590.1	up	8.68	3.12	3.35×10-2	-1.47
CD83	up	6.57	2.72	3.60×10-2	-1.44
SLC43A3	up	3.87	1.95	3.66×10-2	-1.44
SDC4	up	5.47	2.45	3.82×10-2	-1.42
SYNGR3	up	15.2	3.93	3.82×10-2	-1.42
NR4A2	up	2.34	1.23	3.83×10-2	-1.42
NCR3LG1	up	7.73	2.95	3.83×10-2	-1.42
AC025580.2	up	13.12	3.71	3.87×10-2	-1.41
SERTAD1	up	3.82	1.93	3.94×10-2	-1.4
KLHL21	up	3.64	1.87	3.96×10-2	-1.4
AC012181.2	up	4.79	2.26	4.01×10-2	-1.4
LAMB3	up	5.5	2.46	4.01×10-2	-1.4
DKK3	up	6.04	2.59	4.01×10-2	-1.4
SCG5	up	69.88	6.13	4.01×10-2	-1.4
DOT1L	up	3.51	1.81	4.12×10-2	-1.38
PLAUR	up	5.26	2.4	4.12×10-2	-1.38
IER3	up	5.3	2.41	4.12×10-2	-1.38
CLCF1	up	5.79	2.53	4.21×10-2	-1.38
ARMCX1	up	3.59	1.84	4.38×10-2	-1.36
NLRP3	up	5.42	2.44	4.38×10-2	-1.36
DUSP4	up	13.16	3.72	4.38×10-2	-1.36
NSG1	up	15.89	3.99	4.38×10-2	-1.36
BTG3	up	4.94	2.3	4.39×10-2	-1.36
AL135925.1	up	2.87	1.52	4.42×10-2	-1.35
CLIC4	up	3.21	1.68	4.44×10-2	-1.35
THAP9-AS1	up	3.62	1.85	4.44×10-2	-1.35
EHD1	up	3.81	1.93	4.54×10-2	-1.34
MAPK6	up	4.75	2.25	4.54×10-2	-1.34
PEG10	up	39.67	5.31	4.67×10-2	-1.33
MMP14	up	2.95	1.56	4.74×10-2	-1.32
ITGAV	up	2.96	1.56	4.74×10-2	-1.32
PTPN23	up	2.09	1.06	4.78×10-2	-1.32
OBSCN	up	2.42	1.28	4.78×10-2	-1.32
AL137002.2	up	8.39	3.07	4.78×10-2	-1.32
MFSD2A	up	3.93	1.98	4.81×10-2	-1.32
SLAMF7	up	4.89	2.29	4.82×10-2	-1.32
AC016734.1	up	2.28	1.19	4.97×10-2	-1.3
PPP1R15A	up	4.11	2.04	4.97×10-2	-1.3
CAVIN3	up	4.31	2.11	4.97×10-2	-1.3
HSPA5	up	4.62	2.21	4.97×10-2	-1.3
CRIP2	up	5.19	2.38	4.97×10-2	-1.3
FRAT1	down	0.13	2.97	3.85×10-5	-4.42
MBTD1	down	0.42	1.24	5.20×10-4	-3.28
PANK2	down	0.31	1.71	5.67×10-4	-3.25
LINC01970	down	0.06	4.18	3.82×10-3	-2.42
FRAT2	down	0.18	2.44	3.82×10-3	-2.42
C3orf62	down	0.28	1.83	4.34×10-3	-2.36
RUNDC1	down	0.34	1.54	4.34×10-3	-2.36
SNTB2	down	0.38	1.38	4.34×10-3	-2.36
SFTPB	down	0.03	5.25	5.46×10-3	-2.26
TMEM250	down	0.24	2.06	5.46×10-3	-2.26
MAPK14	down	0.4	1.33	5.46×10-3	-2.26
IKZF1	down	0.48	1.06	6.81×10-3	-2.17
AC092117.2	down	0.26	1.96	7.39×10-3	-2.13
EPHB2	down	0.24	2.08	7.47×10-3	-2.13
AC138207.4	down	0.32	1.64	7.47×10-3	-2.13
CDK13	down	0.45	1.14	7.47×10-3	-2.13
MARK2	down	0.29	1.78	9.50×10-3	-2.02
HNRNPAB	down	0.42	1.24	1.35×10-2	-1.87
ADRB1	down	0.21	2.27	1.36×10-2	-1.87
IL17RA	down	0.41	1.28	1.36×10-2	-1.87
HIP1	down	0.44	1.18	1.53×10-2	-1.82
ASPHD2	down	0.27	1.89	1.54×10-2	-1.81
LMO2	down	0.2	2.35	1.16×10-2	-1.79
S1PR4	down	0.34	1.56	1.62×10-2	-1.79
EGLN1	down	0.34	1.55	1.62×10-2	-1.79
S100A8	down	0.36	1.49	1.62×10-2	-1.79
SUZ12P1	down	0.47	1.1	1.64×10-2	-1.79
PAX8-AS1	down	0.26	1.93	1.69×10-2	-1.77
ZNF516	down	0.38	1.38	1.69×10-2	-1.77
SH3BP5L	down	0.44	1.17	1.69×10-2	-1.77
AC093752.1	down	0.46	1.11	1.79×10-2	-1.75
STRN	down	0.48	1.06	1.83×10-2	-1.74
PPP2R5A	down	0.4	1.34	1.97×10-2	-1.71
AC037487.2	down	0.28	1.85	1.99×10-2	-1.7
LRRC75A	down	0.23	2.13	2.03×10-2	-1.69
ORAI3	down	0.29	1.77	2.23×10-2	-1.65
FAM220A	down	0.37	1.45	2.72×10-2	-1.57
ATAD5	down	0.43	1.23	2.73×10-2	-1.56
AC127502.1	down	0.31	1.68	2.79×10-2	-1.56
THAP11	down	0.27	1.9	2.99×10-2	-1.52
ZNF264	down	0.4	1.32	3.07×10-2	-1.51
CTBP2	down	0.49	1.04	3.55×10-2	-1.45
AL513327.1	down	0.21	2.25	3.60×10-2	-1.44
SLC12A9	down	0.48	1.07	3.66×10-2	-1.44
XPO6	down	0.34	1.54	3.94×10-2	-1.4
RAD23B	down	0.43	1.21	3.96×10-2	-1.4
SMAP2	down	0.44	1.18	3.96×10-2	-1.4
AC006141.1	down	0.32	1.64	4.32×10-2	-1.36
C9orf84	down	0.23	2.11	4.38×10-2	-1.36
PTEN	down	0.49	1.03	4.38×10-2	-1.36
SNORA40	down	0.29	1.79	4.39×10-2	-1.36
GATAD1	down	0.5	1	4.42×10-2	-1.35
MANSC1	down	0.22	2.22	4.44×10-2	-1.35
REPS2	down	0.32	1.63	4.44×10-2	-1.35
AC215522.2	down	0.38	1.41	4.74×10-2	-1.32
TMEM102	down	0.3	1.75	4.78×10-2	-1.32
LINGO3	down	0.2	2.3	4.81×10-2	-1.32
PHF23	down	0.46	1.13	4.97×10-2	-1.3
STXBP5	down	0.5	1.01	4.97×10-2	-1.3
